# Supplementary material for: Nitroxide-mediated polymerization of methyl methacrylate by 4,4′-dimethoxydiphenyl-based alkoxyamine
Source: Royal Society of Chemistry journal article supplement (doi:10.1039/c6ra19114b), 2016-01-01
Supplement: c6ra19114b1.pdf [file c6ra19114b1.pdf]

**Support Information for**

**Nitroxide-Mediated Polymerization of Methyl Methacrylate  
by 4,4'-Dimethoxydiphenyl-based Alkoxyamine**

Zhecheng Zhu, Guorong Shan\*, Pengju Pan

*State Key Laboratory of Chemical Engineering, College of Chemical and Biological Engineering,*

*Zhejiang University, 38 Zheda Road, Hangzhou 310027, China*

\*Corresponding Author

Tel.: +86-571-87951334; e-mail: shangr@zju.edu.cn

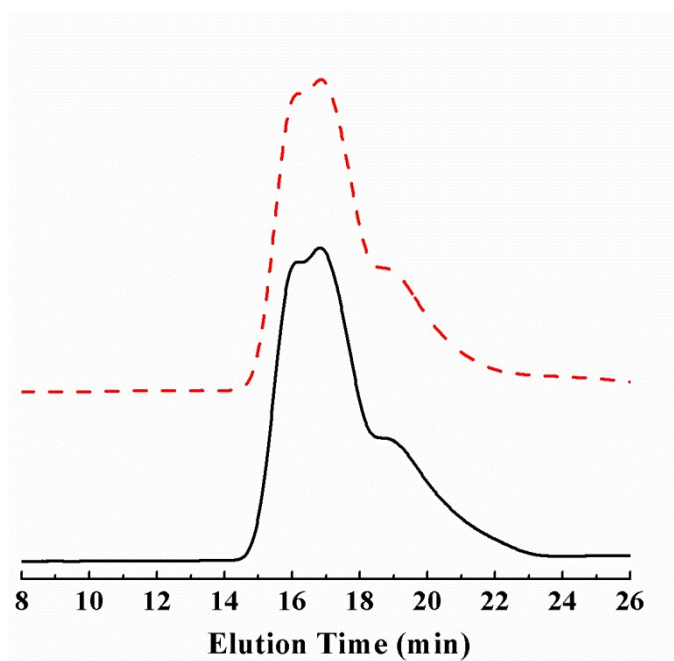

**Figure S1** GPC traces for the reduction experiment, before reduction (solid line), after reduction (dashed line).
